# Supplementary material
Source: PubMed Central journal article supplement (PMC193531)
Supplement: pnas_1830500100_2.pdf [file pnas_1830500100_2.pdf]

Table 1. Model parameters used in 1D simulations

| Dimensional     |                                                              | Dimensionless         |       |
|-----------------|--------------------------------------------------------------|-----------------------|-------|
| L               | 0.1 cm                                                       |                       |       |
| T               | 1 hr                                                         |                       |       |
| U               | 1 nM                                                         |                       |       |
| W               | 0.005 nM·cm                                                  |                       |       |
| $\theta_f$      | 0.11                                                         |                       |       |
| $a_s$           | $5,360 \text{ cm}^{-1}$                                      | $\gamma$              | 250   |
| $x_Z$           | 0.2                                                          |                       |       |
| $x_T$           | 0.2                                                          |                       |       |
| $D_c$           | $2.5 \times 10^{-7} \text{ cm}^2 \cdot \text{s}^{-1}$        | $\delta_c$            | 0.09  |
| $D_n$           | $2.5 \times 10^{-6} \text{ cm}^2 \cdot \text{s}^{-1}$        | $\delta_n$            | 0.9   |
| $F_Z, F_T$      | $23 \text{ nM} \cdot \text{min}^{-1}$                        | $f_Z, f_T$            | 250   |
| $k_p^0$         | $10 \text{ molecules} \cdot \text{cell}^{-1} \text{ h}^{-1}$ | $\hat{k}_p^0$         | 0.001 |
| $k_p^*$         | $1 \text{ h}^{-1}$                                           | $\hat{k}_p^*$         | 1     |
| $k_{s_c p}^+$   | $1 \times 10^6 \text{ M}^{-1} \cdot \text{s}^{-1}$           | $\hat{k}_{s_c p}^+$   | 3.5   |
| $k_{s_c p}^-$   | $7 \text{ h}^{-1}$                                           | $\hat{k}_{s_c p}^-$   | 7.0   |
| $k_{s_c p}$     | $3.5 \text{ h}^{-1}$                                         | $\hat{k}_{s_c p}$     | 3.5   |
| $k_{s_n p}^+$   | $1 \times 10^6 \text{ M}^{-1} \cdot \text{s}^{-1}$           | $\hat{k}_{s_n p}^+$   | 3.5   |
| $k_{s_n p}^-$   | $7 \text{ h}^{-1}$                                           | $\hat{k}_{s_n p}^-$   | 7.0   |
| $k_{s_n p}$     | $3.5 \text{ h}^{-1}$                                         | $\hat{k}_{s_n p}$     | 3.5   |
| $k_{m p}^+$     | $1 \times 10^6 \text{ M}^{-1} \cdot \text{s}^{-1}$           | $\hat{k}_{m p}^+$     | 3.5   |
| $k_{m p}^-$     | $3.5 \text{ h}^{-1}$                                         | $\hat{k}_{m p}^-$     | 3.5   |
| $k_{m p}$       | $10 \text{ h}^{-1}$                                          | $\hat{k}_{m p}$       | 35.0  |
| $k_{s_c p m}^+$ | $1 \times 10^6 \text{ M}^{-1} \cdot \text{s}^{-1}$           | $\hat{k}_{s_c p m}^+$ | 3.5   |
| $k_{s_c p m}^-$ | $3.5 \text{ h}^{-1}$                                         | $\hat{k}_{s_c p m}^-$ | 3.5   |
| $k_{s_c p m}$   | $35 \text{ h}^{-1}$                                          | $\hat{k}_{s_c p m}$   | 35    |
| $k_{s_n p m}^+$ | $1 \times 10^6 \text{ M}^{-1} \cdot \text{s}^{-1}$           | $\hat{k}_{s_n p m}^+$ | 3.5   |
| $k_{s_n p m}^-$ | $3.5 \text{ h}^{-1}$                                         | $\hat{k}_{s_n p m}^-$ | 3.5   |
| $k_{s_n p m}$   | $3.5 \text{ h}^{-1}$                                         | $\hat{k}_{s_n p m}$   | 3.5   |
| $k_{s_c}$       | $1 \text{ h}^{-1}$                                           | $\hat{k}_{s_c}$       | 1     |
| $k_{s_n}$       | $1 \text{ h}^{-1}$                                           | $\hat{k}_{s_n}$       | 1     |
| $k_p$           | $3 \text{ h}^{-1}$                                           | $\hat{k}_p$           | 3     |
| $s_{bead}^0$    | 10 nM                                                        | $\hat{s}_{bead}^0$    | 10    |
| $s_{tiss}^0$    | 4 nM                                                         | $\hat{s}_{tiss}^0$    | 4     |
