# Supplementary material
Source: PubMed Central journal article supplement (PMC193531)
Supplement: pnas_1830500100_3.pdf [file pnas_1830500100_3.pdf]

Table 2. Model parameters for 2D simulation

| Dimensional             |                                                                | Dimensionless   |                    |
|-------------------------|----------------------------------------------------------------|-----------------|--------------------|
| Domain size             | $0.2 \times 0.2 \text{ cm}^2$                                  | Domain size     | $0.2 \times 0.2$   |
| Mesh size               | $0.0015625 \text{ cm}$                                         | Mesh size       | $0.015625$         |
| Maximum boundary points | 512                                                            | Grid points     | $128 \times 128$   |
| Time-step               | $1 \times 10^{-4} \text{ h}$                                   | Time-step       | $1 \times 10^{-4}$ |
| Simulation time         | 24 h                                                           | Simulation time | 24                 |
| Lag time                | 30 min                                                         | Lag time        | 0.5                |
| $k_{FGF}$               | $2 \text{ h}^{-1}$                                             | $\hat{k}_{FGF}$ | 2                  |
| $V_Z$                   | $500 \text{ h}^{-1}$                                           | $V_Z$           | 500                |
| $K_Z$                   | 1 nM                                                           | $K_Z$           | 1                  |
| $V_A$                   | $50 \text{ h}^{-1}$                                            | $V_A$           | 50                 |
| $K_A$                   | 1 nM                                                           | $K_A$           | 1                  |
| $\rho$                  | $1 \text{ g}\cdot\text{cm}^{-3}$                               | $\rho$          | 1                  |
| $\mu$                   | $1 \times 10^7 \text{ g}\cdot\text{cm}^{-1}\cdot\text{s}^{-1}$ | $\mu$           | $1 \times 10^7$    |
|                         |                                                                | $S_1$           | $1 \times 10^{10}$ |
|                         |                                                                | $S_2$           | $4 \times 10^{11}$ |
|                         |                                                                | $S_3$           | $4 \times 10^{11}$ |
